# Supplementary material for: Clinical, Pathological, and Genetic Characteristics of Patients with Digenic Alport Syndrome
Source: PubMed Central journal article supplement — Kidney360. 2024 Aug 13;5(10):1510–7. doi: 10.34067/KID.0000000000000547 (PMC11556934; doi:10.34067/kid.0000000000000547), 2024-08-13
Supplement: kidney360-5-1510-s002.pdf [file kidney360-5-1510-s002.pdf]

# **Clinical, Pathological, and Genetic Characteristics of Patients with Digenic Alport Syndrome**

Yuta Inoki, MD<sup>1</sup>, Tomoko Horinouchi, MD, PhD<sup>1,\*</sup>, Tomohiko Yamamura MD, PhD<sup>1</sup>,  
Shingo Ishimori MD, PhD<sup>1</sup>, Yuta Ichikawa MD<sup>1</sup>, Yu Tanaka MD<sup>1</sup>, Chika Ueda MD<sup>1</sup>,  
Hideaki Kitakado MD<sup>1</sup>, Atsushi Kondo MD, PhD<sup>1</sup>, Nana Sakakibara MD, PhD<sup>1</sup>, China  
Nagano MD, PhD<sup>1</sup>, Kandai Nozu MD, PhD<sup>1</sup>

<sup>1</sup> Department of Pediatrics, Kobe University Graduate School of Medicine, Kobe,  
Hyogo, Japan

## **\*Corresponding author**

Tomoko Horinouchi, MD, PhD

Department of Pediatrics, Kobe University Graduate School of Medicine

7-5-1 Kusunoki-cho, Chuo, Kobe, Hyogo 650-0017, Japan

E-mail: tohori@med.kobe-u.ac.jp

Tel: +81-78-382-5111

**Supplemental Table 1.** List of 68 podocyte-related genes included in targeted sequencing analysis within a clinically approved gene panel test developed in our laboratory.

|                 |               |                |               |                 |               |
|-----------------|---------------|----------------|---------------|-----------------|---------------|
| <i>ACTN4</i>    | <i>COQ2</i>   | <i>ITSN1</i>   | <i>MAGI2</i>  | <i>PAX2</i>     | <i>TPRKB</i>  |
| <i>ADCK4</i>    | <i>COQ6</i>   | <i>ITSN2</i>   | <i>MYH9</i>   | <i>PDSS2</i>    | <i>TRIM8</i>  |
| <i>ANKFY1</i>   | <i>CRB2</i>   | <i>KANK1</i>   | <i>MYO1E</i>  | <i>PLCE1</i>    | <i>TRPC6</i>  |
| <i>ANLN</i>     | <i>CUBN</i>   | <i>KANK2</i>   | <i>NPHS1</i>  | <i>PODXL</i>    | <i>TTC21B</i> |
| <i>ARHGAP24</i> | <i>DLC1</i>   | <i>KANK4</i>   | <i>NPHS2</i>  | <i>PRDM15</i>   | <i>WDR4</i>   |
| <i>ARHGDI1A</i> | <i>EMP2</i>   | <i>KIRREL1</i> | <i>NUP85</i>  | <i>PTPRO</i>    | <i>WDR73</i>  |
| <i>AVIL</i>     | <i>FAT1</i>   | <i>LAGE3</i>   | <i>NUP93</i>  | <i>SCARB2</i>   | <i>WT1</i>    |
| <i>CD2AP</i>    | <i>GAPVD1</i> | <i>LAMA5</i>   | <i>NUP107</i> | <i>SGPL1</i>    | <i>XPO5</i>   |
| <i>CKD20</i>    | <i>GON7</i>   | <i>LAMB2</i>   | <i>NUP133</i> | <i>SMARCAL1</i> |               |
| <i>COL4A3</i>   | <i>INF2</i>   | <i>LMNA</i>    | <i>NUP160</i> | <i>TNS2</i>     |               |
| <i>COL4A4</i>   | <i>ITGA3</i>  | <i>LMX1B</i>   | <i>NUP205</i> | <i>TBC1D8B</i>  |               |
| <i>COL4A5</i>   | <i>ITGB4</i>  | <i>MAFB</i>    | <i>OSGEP</i>  | <i>TP53RK</i>   |               |

## Supplemental Figure 1

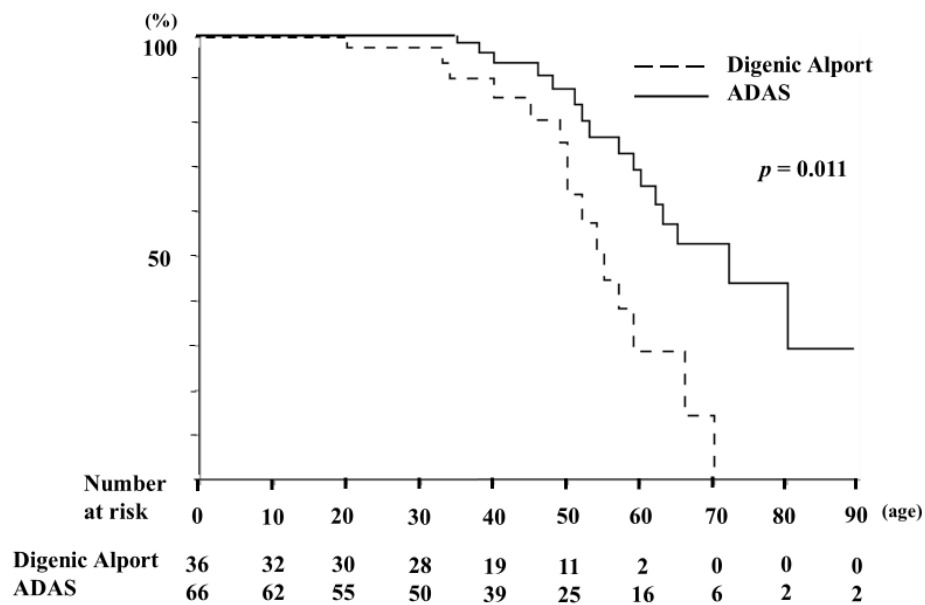

**Figure S1.** Probability of developing ESKD in Alport syndrome cases with digenic *COL4A3* and *COL4A4* variants including previously reported<sup>1</sup> cases compared with that in autosomal dominant Alport syndrome (ADAS) cases in our cohort ( $P = 0.011$ ).

1. Savige J, Renieri A, Ars E, et al. Digenic Alport syndrome. *Clin J Am Soc Nephrol*.

2022;17(11):1697-1706. <https://doi.org/10.2215/CJN.03120322>
